# Supplementary material for: Bacterial Communities Associated with Atherosclerotic Plaques from Russian Individuals with Atherosclerosis
Source: PubMed Central journal article supplement (PMC5063344; doi:10.1371/journal.pone.0164836), 2016-10-13
Supplement: pone.0164836.s001.pdf [file pone.0164836.s001.pdf]

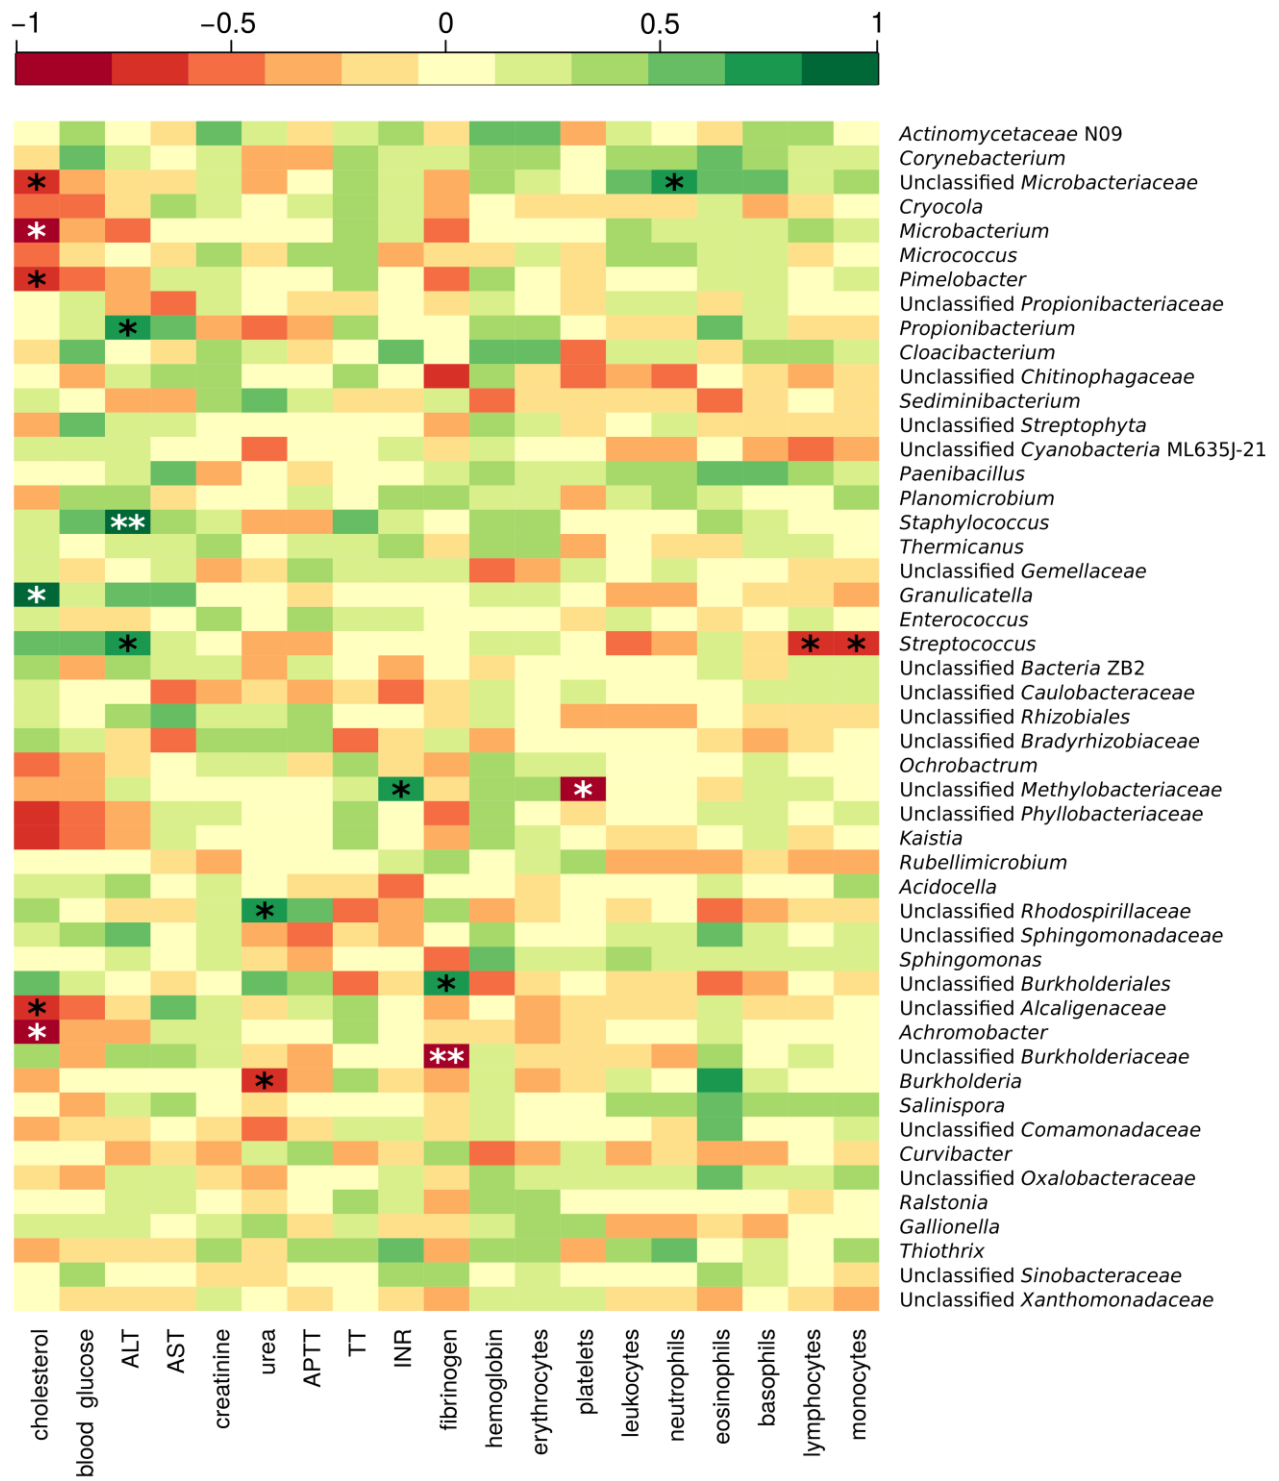

Fig S1.
