# Supplementary material for: Bacterial Communities Associated with Atherosclerotic Plaques from Russian Individuals with Atherosclerosis
Source: PubMed Central journal article supplement (PMC5063344; doi:10.1371/journal.pone.0164836), 2016-10-13
Supplement: pone.0164836.s002.pdf [file pone.0164836.s002.pdf]

**Table S1.**

|                                 | Values                                            | Patients ( <i>n</i> = 28) |
|---------------------------------|---------------------------------------------------|---------------------------|
| Blood chemistry tests           | Total cholesterol, mmol/L                         | 5.05 ± 1.39               |
|                                 | Blood glucose, mmol/L                             | 5.73 ± 1.46               |
|                                 | Alanine aminotransferase (ALT), u/L               | 23.90 ± 13.09             |
|                                 | Aspartate aminotransferase (AST), u/L             | 23.59 ± 7.27              |
|                                 | Creatinine, μmol/L                                | 90.13 ± 18.79             |
|                                 | Urea, mmol/L                                      | 6.05 ± 1.48               |
| Coagulation tests               | Activated partial thromboplastin time (APTT), sec | 31.69 ± 2.98              |
|                                 | Thrombin time (TT), sec                           | 18.95 ± 1.38              |
|                                 | International normalized ratio (INR)              | 0.99 ± 0.06               |
|                                 | Fibrinogen, g/L                                   | 3.54 ± 0.95               |
| Hematological tests             | Hemoglobin, g/L                                   | 145.00 ± 13.36            |
|                                 | Erythrocytes, × 10 <sup>12</sup> /L               | 4.61 ± 0.36               |
|                                 | Platelets, × 10 <sup>9</sup> /L                   | 293.73 ± 94.67            |
|                                 | Leukocytes, × 10 <sup>9</sup> /L                  | 7.32 ± 2.33               |
|                                 | Neutrophils, × 10 <sup>9</sup> /L                 | 4.14 ± 1.42               |
|                                 | Eosinophils, × 10 <sup>9</sup> /L                 | 0.24 ± 0.19               |
|                                 | Basophils, × 10 <sup>9</sup> /L                   | 0.05 ± 0.03               |
|                                 | Lymphocytes, × 10 <sup>9</sup> /L                 | 2.30 ± 0.92               |
| Monocytes, × 10 <sup>9</sup> /L | 0.59 ± 0.21                                       |                           |
